# Supplementary material for: Structural insights into recognition of chemokine receptors by Staphylococcus aureus leukotoxins
Source: eLife. 2022 Mar 21;11:e72555. doi: 10.7554/eLife.72555 (PMC9005193; doi:10.7554/eLife.72555)
Supplement: Figure 2—source data 1. [file elife-72555-fig2-data1.xlsx]

## Sheet: ACKR1
User: OMOLADE													User: OMOLADE														User: OMOLADE
Path: C:\Program Files (x86)\BMG\PHERAstar\OMOLADE\Data\													Path: C:\Program Files (x86)\BMG\PHERAstar\OMOLADE\Data\														Path: C:\Program Files (x86)\BMG\PHERAstar\OMOLADE\Data\
Test ID: 271													Test ID: 273														Test ID: 277
Test Name: TR-FRET RED (D2)													Test Name: TR-FRET RED (D2)														Test Name: TR-FRET RED (D2)
Date: 21/04/2021													Date: 22/04/2021														Date: 05/05/2021
Time: 16:48:33													Time: 16:21:54														Time: 15:01:06
ID1: 210421 ACKR1 competition P2													ID1: 210422 ACKR1 competition														ID1: 210505 ACKR1 competition D&E
Time resolved fluorescence (dual emission)													Time resolved fluorescence (dual emission)														Time resolved fluorescence (dual emission)
	1. Raw Data (337/620 B)													1. Raw Data (337/620 B)														1. Raw Data (337/620 B)
	1	2	3	4	5	6	7	8	9	10	11	12		1	2	3	4	5	6	7	8	9	10	11	12			1	2	3	4	5	6	7	8	9	10	11	12
A				4258	5087	3786							A				3386	3558	2796								A				5326	6863	5884
B				5493	6097	4465							B				3381	3419	2965								B				6166	5553	6400
C				6416	5848	4152							C				3853	3066	2817								C				6342	6411	5467
D				5017	4091	4178							D				3100	3554	3187								D				5602	5145	7287
E				6899	6497	3910				4087	3605	3599	E				3204	2964	3271				2719	2891	2264		E				6409	5451	5583				5458	4639	5408
F				4658	4256	5184							F				2654	3152	3174								F				4714	5282	4925
G				6640	3113	4775				5463	4897	3541	G				3280	2823	1877				2911	2796	2517		G				6641	6689	6761				5656	5896	4439
H				5846	2862	2060							H				3227	2974	3228								H				5250	6280	5615
																												2. Raw Data (337/665 A)
				4	5	6				10	11	12					4	5	6				10	11	12			1	2	3	4	5	6	7	8	9	10	11	12
A				15239	17742	13279							A				11557	12352	9937								A				21301	27747	24168
B				18798	20955	15060							B				10264	10558	9772								B				22840	22166	23751
C				21900	20500	13752							C				9337	7581	7661								C				23409	26001	19754
D				16651	11725	13399							D				10260	11535	10734								D				19945	18023	27072
E				21169	17032	11420				3931	3417	3463	E				9542	8285	9984				2519	2717	2111		E				20883	17558	18035				5241	4681	5550
F				12341	10435	11260							F				6511	8412	8112								F				12712	12995	12459
G				13639	5478	10074				16725	15526	11062	G				13368	10651	7094				7406	7959	6184		G				13475	13882	14341				20223	18938	15020
H				9383	4321	3153							H				4899	4681	4966								H				8395	10849	9409
																												3. Ratio based on Raw Data (337 / 665 / 620)
				4	5	6				10	11	12					4	5	6				10	11	12			1	2	3	4	5	6	7	8	9	10	11	12
A				35789.1	34877.1	35074							A				34131.7	34716.1	35540.1								A				39994.4	40429.8	41074.1
B				34221.7	34369.4	33729							B				30357.9	30880.4	32957.8								B				37041.8	39917.2	37110.9
C				34133.4	35054.7	33121.4							C				24233.1	24726	27195.6								C				36911.1	40556.9	36133.2
D				33189.2	28660.5	32070.4							D				33096.8	32456.4	33680.6								D				35603.4	35030.1	37151.1
E				30684.2	26215.2	29207.2			Negative	9618.3	9478.5	9622.12	E				29781.5	27952.1	30522.8			Negative	9264.44	9398.13	9324.2		E				32583.9	32210.6	32303.4			Negative	9602.42	10090.5	10262.6
F				26494.2	24518.3	21720.7							F				24532.8	26687.8	25557.7								F				26966.5	24602.4	25297.5
G				20540.7	17597.2	21097.4			Positive	30615	31705.1	31239.8	G				40756.1	37729.4	37794.3			Positive	25441.4	28465.7	24568.9		G				20290.6	20753.5	21211.4			Positive	35754.9	32120.1	33836.4
H				16050.3	15097.8	15305.8							H				15181.3	15739.7	15384.1								H				15990.5	17275.5	16756.9
	Well	Concentration (Log[M])
	A	-8.33348
	B	-8
	C	-7.66756
	D	-7.33348
	E	-7
	F	-6.66756
	G	-6.33348
	H	-6

## Sheet: CCR5
User: OMOLADE														User: OMOLADE														User: OMOLADE
Path: C:\Program Files (x86)\BMG\PHERAstar\OMOLADE\Data\														Path: C:\Program Files (x86)\BMG\PHERAstar\OMOLADE\Data\														Path: C:\Program Files (x86)\BMG\PHERAstar\OMOLADE\Data\
Test ID: 238														Test ID: 244														Test ID: 267
Test Name: TR-FRET RED (D2)														Test Name: TR-FRET RED (D2)														Test Name: TR-FRET RED (D2)
Date: 04/03/2021														Date: 05/03/2021														Date: 15/04/2021
Time: 16:35:22														Time: 16:34:49														Time: 15:52:27
ID1: 210304 CCR5 Toxins P3														ID1: 210305 CCR5 Toxins P3														ID1: 210415 CCR5 competition P3
Time resolved fluorescence (dual emission)														Time resolved fluorescence (dual emission)														Time resolved fluorescence (dual emission)
	1. Raw Data (337/620 B)														1. Raw Data (337/620 B)														1. Raw Data (337/620 B)
	1	2	3	4	5	6	7	8	9	10	11	12			1	2	3	4	5	6	7	8	9	10	11	12			1	2	3	4	5	6	7	8	9	10	11	12
A				2841	2441	1996								A				2428	2954	2830								A				2662	2239	2438
B				3338	3589	5503								B				2042	4028	1843								B				2567	2426	2456
C				2974	2395	2187								C				4012	4731	3645								C				2327	2150	2349
D				2469	2405	2601								D				3726	3513	6524								D				2549	2315	2166
E				2493	2612	1608				2248	1795	1719		E				5042	5131	5251				3338	3822	4095		E				1966	1987	2108				1752	1955	1536
F				2904	2474	2842								F				525	4788	12802								F				2378	1991	2768
G				2003	2396	2009				2062	1921	1729		G				4792	4187	4525				3880	2812	3546		G				2629	2020	1913				1179	2586	1308
H				2710	2219	2453								H				4887	3947	4037								H				2849	2043	2065
	2. Raw Data (337/665 A)														2. Raw Data (337/665 A)														2. Raw Data (337/665 A)
	1	2	3	4	5	6	7	8	9	10	11	12			1	2	3	4	5	6	7	8	9	10	11	12			1	2	3	4	5	6	7	8	9	10	11	12
A				3312	2868	2549								A				4943	6244	5681								A				4931	3810	3968
B				3900	4292	6201								B				4027	7825	4089								B				4223	4180	4188
C				3627	2956	2454								C				8505	9441	7668								C				4119	3750	3681
D				2740	2722	2851								D				7184	6882	12462								D				4134	4005	3417
E				2600	2855	1807				1856	1472	1439		E				9407	8617	9753				3095	3405	3477		E				3073	2906	3210				1505	1714	1255
F				2819	2494	2719								F				739	7632	19384								F				3538	2738	4287
G				1859	2176	1830				2471	2496	2215		G				7002	6252	6651				7543	6284	6954		G				3296	2516	2308				1805	4266	2155
H				2362	1915	2038								H				6269	5060	5011								H				3212	2278	2217
	3. Ratio based on Raw Data (337 / 665 / 620)														3. Ratio based on Raw Data (337 / 665 / 620)														3. Ratio based on Raw Data (337 / 665 / 620)
	1	2	3	4	5	6	7	8	9	10	11	12			1	2	3	4	5	6	7	8	9	10	11	12			1	2	3	4	5	6	7	8	9	10	11	12
A				11657.9	11749.3	12770.5								A				20358.3	21137.4	20074.2								A				18523.7	17016.5	16275.6
B				11683.6	11958.8	11268.4								B				19720.9	19426.5	22186.7								B				16451.1	17230	17052.1
C				12195.7	12342.4	11220.9								C				21198.9	19955.6	21037								C				17700.9	17441.9	15670.5
D				11097.6	11318.1	10961.2								D				19280.7	19590.1	19101.8								D				16218.1	17300.2	15775.6
E				10429.2	10930.3	11237.6			Negative	8256.23	8200.56	8371.15		E				18657.3	16794	18573.6			Negative	9272.02	8908.95	8490.84		E				15630.7	14625.1	15227.7			Negative	8590.18	8767.26	8170.57
F				9707.3	10080.8	9567.21								F				14076.2	15939.9	15141.4								F				14878	13751.9	15487.7
G				9281.08	9081.8	9109.01			Positive	11983.5	12993.2	12810.9		G				14611.9	14931.9	14698.3			Positive	19440.7	22347.1	19610.8		G				12537.1	12455.5	12064.8			Positive	15309.6	16496.5	16475.5
H				8715.87	8630.01	8308.19								H				12827.9	12819.9	12412.7								H				11274.1	11150.3	10736.1
	Well	Concentration (Log[M])
	A	-8.33348
	B	-8
	C	-7.66756
	D	-7.33348
	E	-7
	F	-6.66756
	G	-6.33348
	H	-6

## Sheet: CCR2
User: OMOLADE
Path: C:\Program Files (x86)\BMG\PHERAstar\OMOLADE\Data\
Test ID: 286
Test Name: TR-FRET RED (D2)
Date: 17/06/2021
Time: 16:56:56
ID1: 210616 CCR2 competition D/E
Time resolved fluorescence (dual emission)
															2021-06-22															2021-06-25
															1. Raw Data (340/665 B)															1. Raw Data (340/665 B)
	1. Raw Data (337/620 B)
	1	2	3	4	5	6	7	8	9	10	11	12			<>	1	2	3	4	5	6	7	8	9	10	11	12			<>	1	2	3	4	5	6	7	8	9	10	11	12
A				1319	1195	1443									A				18390	22585	16927									A	10202	15816	21328
B				1223	1361	1152									B				26947	29412	24816									B	17580	20484	22688
C				1194	1245	984									C				21170	21243	19493									C	15739	20570	19997
D				1308	1421	1212									D				24780	19730	21583									D	13103	15209	16051
E				1159	1335	1118									E				18887	15187	15034									E	10340	14229	10770							9038	8269	6741
F				1642	1331	1326									F				19210	18278	16310				27355	27519	19032			F	9042	11551	11314							25275	22714	17320
G				1541	1211	1261				1256	1421	1505			G				18318	16382	15711				30062	22032	7358			G	6360	7393	7730							24468	21851	16376
H				1146	1492	1667				1591	1449	1670			H				9555	11117	12371				5964	6148	5897			H	5872	5330	6219
	2. Raw Data (337/665 A)														2. Raw Data (340/620 A)															2. Raw Data (340/620 A)
				4	5	6				10	11	12			<>	1	2	3	4	5	6	7	8	9	10	11	12			<>	1	2	3	4	5	6	7	8	9	10	11	12
A				2988	2655	3953									A				17168	20691	16051									A	16082	25082	30742
B				3012	3138	2788									B				23156	30103	24531									B	27614	34098	37221
C				2717	2687	2170									C				24277	22943	20919									C	32179	36898	37027
D				2564	2919	2362									D				30719	21731	23431									D	26849	34077	34586
E				2194	2758	1972									E				24172	22208	22229									E	28163	35789	29741							37914	37134	28621
F				2597	2032	2175									F				24791	24873	23617				24466	22903	15964			F	26908	37121	36863							36850	32804	27372
G				2215	1731	1755				3030	3939	4633			G				25170	23297	24472				23548	18586	18320			G	24630	30290	31192							33829	34720	24495
H				1307	1713	2048				1820	1632	1931			H				15615	20369	20792				17068	14588	14853			H	24864	24834	27963
	3. Ratio based on Raw Data (337 / 665 / 620)
				4	5	6				10	11	12			3. Ratio based on Raw Data (340 / 665 / 620)															3. Ratio based on Raw Data (340 / 665 / 620)
A				22653.5	22217.6	27394.3													10711.8	10915.4	10545.8										6343.74	6305.72	6937.74
B				24628	23056.6	24201.4													11637.2	9770.45	10116.2										6366.34	6007.39	6095.48
C				22755.4	21582.3	22052.8													8720.19	9259.03	9318.32										4891.08	5574.83	5400.65
D				19602.5	20541.9	19488.5													8066.67	9079.2	9211.3										4880.26	4463.13	4640.9
E				18930.1	20659.2	17638.6													7813.59	6838.53	6763.24										3671.48	3975.8	3621.26						Negative	2383.82	2226.8	2355.26
F				15816.1	15266.7	16402.7													7748.78	7348.53	6906.04			LukE, -8.7	11180.8	12015.5	11921.8				3360.34	3111.72	3069.2						LukE, -8.7	6858.89	6924.16	6327.63
G				14373.8	14294	13917.5			Positive	24124.2	27719.9	30784							7277.71	7031.81	6419.99			Positive	12766.3	11854.1					2582.22	2440.74	2478.2						Positive	7232.85	6293.49	6685.45
H				11404.9	11481.2	12285.5			Negative	11439.4	11262.9	11562.9							6119.12	5457.8	5949.88			Negative	3494.26	4214.42	3970.24				2361.65	2146.25	2224.01
	Well	Concentration (Log[M])
	A	-8.33348
	B	-8
	C	-7.66756
	D	-7.33348
	E	-7
	F	-6.66756
	G	-6.33348
	H	-6
